# Supplementary material
Source: PubMed Central journal article supplement (PMC4022185)

**Supplemental Digital Content 3 – Figure 1** Plot of standard errors vs. log-transformed risk ratios of the effect of DOT-HAART on VL suppression for detection of publication bias.

The middle dotted line indicates the log-transformed fixed effects summary estimate, while the diagonal lines show expected 95% confidence bounds for a given standard error, assuming no heterogeneity between studies. Squared studies indicate randomized clinical trials. RR, risk ratio.

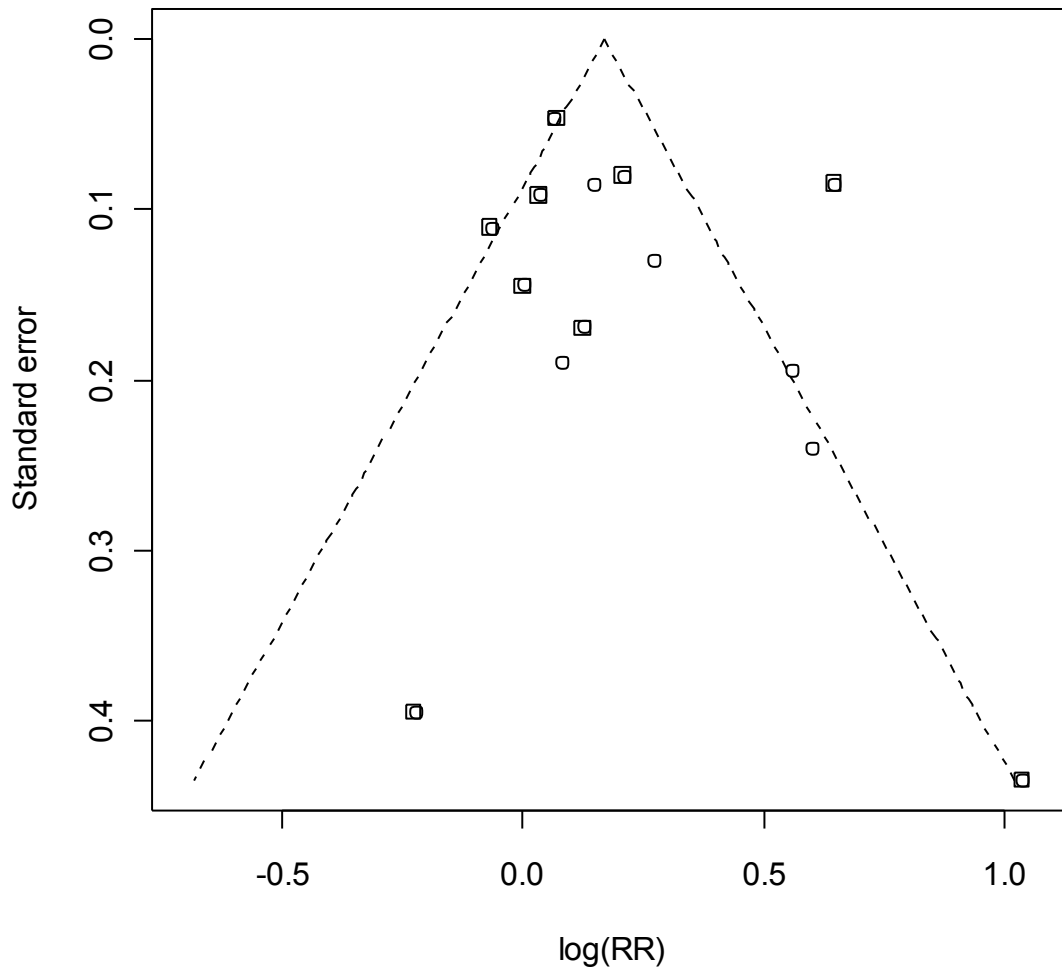

Supplement: NIHMS533283-supplement-Supplementary_Digital_3.pdf [file NIHMS533283-supplement-Supplementary_Digital_3.pdf]
